# Supplementary material for: Phylogeny and Expression Analyses Reveal Important Roles for Plant PKS III Family during the Conquest of Land by Plants and Angiosperm Diversification
Source: Front Plant Sci. 2016 Aug 30;7:1312. doi: 10.3389/fpls.2016.01312 (PMC5004622; doi:10.3389/fpls.2016.01312)
Supplement: TABLE S1 — Information on the genomes and transcriptomes used in this study that were downloaded from public databases. [file Table_1.XLSX]

## Sheet: SupTable1-database
species	version	genome source	reference	transcriptome source	transcriptome type	root sample	stem sample	leaf sample	flower sample	fruit sample	reference
phycophyte
Micromonas pusilla	CCMP1545 v3.0	https://phytozome.jgi.doe.gov/pz/portal.html	Worden AZ, Lee J-H, Mock T et al (2009) Green evolution and dynamic adaptations revealed by genomes of the marine picoeukaryotes Micromonas. Science 324: 268-272
Coccomyxa subellipsoidea	C169 v2.0	https://phytozome.jgi.doe.gov/pz/portal.html	Blanc G, Agarkova I, Grimwood J et al (2012) The genome of the polar eukaryotic microalga Coccomyxa subellipsoidea reveals traits of cold adaptation. Genome Biol 13 (5): R39
Ostreococcus lucimarinus	v2.0	https://phytozome.jgi.doe.gov/pz/portal.html	Palenik B, Grimwood J, Aerts A et al (2007) The tiny eukaryote Ostreococcus provides genomic insights into the paradox of plankton speciation. Proc Natl Acad Sci U S A 104 (18): 7705-7710
Volvox carteri	v2.0	https://phytozome.jgi.doe.gov/pz/portal.html	Prochnik SE, Umen J, Nedelcu AM et al (2010) Genomic analysis of organismal complexity in the multicellular green alga Volvox carteri. Science 329: 223-226
Chlamydomonas reinhardtii	v5.5	https://phytozome.jgi.doe.gov/pz/portal.html	Merchant SS, Prochnik SE, Vallon O et al (2007) The Chlamydomonas genome reveals the evolution of key animal and plant functions. Science 318: 245-251
Klebsormidium flaccidum	v1.0	http://www.plantmorphogenesis.bio.titech.ac.jp/~algae_genome_project/klebsormidium/index.html	Hori K, Maruyama F, Fujisawa et al (2014) Klebsormidium flaccidum genome reveals primary factors for plant terrestrial adaptation. Nat Commun 5, 3978
Embryophyte
Physcomitrella patens	v3.0	https://phytozome.jgi.doe.gov/pz/portal.html	Stefan A. Rensing, Lang D, Zimmer AD et al (2008) The Physcomitrella genome reveals evolutionary insights into the conquest of land by plants. Science 319: 64-69
Tracheophyte
Selaginella moelledorffii	v1.0	https://phytozome.jgi.doe.gov/pz/portal.html	Banks JA, Nishiyama T, Hasebe M et al (2011) The Selaginella genome identifies genetic changes associated with the evolution of vascular plants. Science 332: 960-963
Angiosperm
Amborella trichopoda	v1.0	http://plants.ensembl.org/info/website/ftp/index.html	Project AG. 2013. The Amborella genome and the evolution of flowering plants. Science 342: 1467-1467
Eudicotyledoneae
Aquilegia coerulea	v1.1	https://phytozome.jgi.doe.gov/pz/portal.html	Aquilegia coerulea Genome Sequencing Project, http://phytozome.jgi.doe.gov/pz/portal.html#!info?alias=Org_Acoerulea
Vitis vinifera	Genoscope.12X	https://phytozome.jgi.doe.gov/pz/portal.html	Jaillon O, Aury JM, Noel B et al (2007) The grapevine genome sequence suggests ancestral hexaploidization in major angiosperm phyla. Nature 449 (7161): 463-467	http://bar.utoronto.ca/efp_grape/cgi-bin/efpWeb.cgi	Microarray	GSM881583,GSM881584,GSM881585	GSM881664,GSM881665,GSM881666	GSM881586,GSM881587,GSM881588	GSM881574,GSM881575,GSM881576	GSM881646,GSM881647,GSM881648	Fasoli M, Santo SD, Zenoni S et al (2012) The grapevine expression atlas reveals a deep transcriptome shift driving the entire plant into a maturation program. Plant Cell 24:3489-3505
Citrus sinensis	V1.1	https://phytozome.jgi.doe.gov/pz/portal.html	Sweet Orange Genome Project 2010, http://phytozome.jgi.doe.gov/pz/portal.html#!info?alias=Org_Csinensis
Citrus clementina	V1.0	https://phytozome.jgi.doe.gov/pz/portal.html	Haploid Clementine Genome, International Citrus Genome Consortium, 2011, http://int-citrusgenomics.org/, http://phytozome.jgi.doe.gov/pz/portal.html#!info?alias=Org_Cclementina
Arabidopsis thaliana	v10	http://www.arabidopsis.org/	Lamesch P, Berardini TZ, Li D, Swarbreck D et al (2012) The Arabidopsis Information Resource (TAIR): improved gene annotation and new tools. Nucleic Acids Res 40:1202-1210	http://bar.utoronto.ca/efp/cgi-bin/efpWeb.cgi	Microarray	ATGE_3_A,ATGE_3_B,ATGE_3_C	ATGE_27_A,ATGE_27_B,ATGE_27_C	ATGE_89_A,ATGE_89_B,ATGE_89_C	ATGE_32_A2,ATGE_32_B2,ATGE_32_C2	ATGE_78_D,ATGE_78_E,ATGE_78_F	Schmid M, Davison TS, Henz SR et al (2005) A gene expression map of Arabidopsis thaliana development. Nat Genet 37:501-506
Brassica oleracea	v2.1	http://plants.ensembl.org/info/website/ftp/index.html	Liu S, Liu Y, Yang X et al (2014) The Brassica oleracea genome reveals the asymmetrical evolution of polyploid genomes. Nat Commun 5: 3930	http://www.ncbi.nlm.nih.gov/bioproject/PRJNA183713	RNA-seq	SRR630925	SRR630927	SRR630924	SRR630923	SRR630926	Yu J, Tehrim S, Zhang F et al (2014) Genome-wide comparative analysis of NBS-encoding genes between Brassica species and Arabidopsis thaliana. BMC genomics 15:3
Brassica rapa	v1.5	http://brassicadb.org/brad/	Wang X, Wang H, Wang J et al (2011) The genome of the mesopolyploid crop species Brassica rapa. Nat Genet 43 (10): 1035-1039	http://www.ncbi.nlm.nih.gov/bioproject/PRJNA185152	RNA-seq	SRR643625	SRR643628	SRR643623	SRR643622	SRR643627	Tong C, Wang X, Yu J et al (2013) Comprehensive analysis of RNA-seq data reveals the complexity of the transcriptome in Brassica rapa. BMC genomics 14:1-10
Populus trichocarpa	v3.0	https://phytozome.jgi.doe.gov/pz/portal.html	Tuskan GA, DiFazio S, Jansson S et al (2006) The genome of black cottonwood, Populus trichocarpa (torr. & gray). Science 313: 1596-1604	http://bar.utoronto.ca/efppop/cgi-bin/efpWeb.cgi	Microarray	bot0885,bot0886,bot0887	bot1017,bot1018,bot1019	bot0882,bot0883,bot0884	bot0945,bot0946,bot0947	-	Wilkins O, Nahal H, Foong J, Provart NJ, Campbell MM (2009) Expansion and diversification of the Populus R2R3-MYB family of transcription factors. Plant Physiol 149:981-993
Medicago truncatula	Mt4.0v1	https://phytozome.jgi.doe.gov/pz/portal.html	Young ND, Debellé F, Oldroyd GED et al (2011) The Medicago genome provides insight into the evolution of rhizobial symbioses. Nature 480 (7378): 520-524	http://bar.utoronto.ca/efpmedicago/cgi-bin/efpWeb.cgi	Microarray	Root_rep1,Root_rep2,Root_rep3	Stem_rep1,Stem_rep2,Stem_rep3	Leaf_rep1,Leaf_rep2,Leaf_rep3	Flower_rep1,Flower_rep2,Flower_rep3	Pod_rep1,Pod_rep2,Pod_rep3	Benedito VA, Torres-Jerez I, Murray JD et al (2008) A gene expression atlas of the model legume Medicago truncatula. Plant J 55:504-513
Glycine max	Wm82.a1.v1	https://phytozome.jgi.doe.gov/pz/portal.html	Schmutz J, Cannon SB, Schlueter J et al (2010) Genome sequence of the palaeopolyploid soybean. Nature 463 (7278): 178-183	Phytozome 10	RNA-seq	Root	Stem	Leaves	Flower	Pod	Based on reads supplied by the Gary Stacey laboratory at the University of Missouri (http://staceylab.missouri.edu/)
Cucumis sativus	v2	http://www.icugi.org/cgi-bin/ICuGI/index.cgi	Huang S, Li R, Zhang Z et al (2009) The genome of the cucumber, Cucumis sativus L. Nat Genet 41 (12): 1275-1281	http://www.ncbi.nlm.nih.gov/bioproject/PRJNA80169	RNA-seq	SRR351489	SRR351905	SRR351906	SRR351912	SRR351489	Li Z, Zhang Z, Yan P et al (2011) RNA-seq improves annotation of protein-coding genes in the cucumber genome. BMC genomics 12:540
Fragaria vesca	v1.1	https://phytozome.jgi.doe.gov/pz/portal.html	Shulaev V, Sargent DJ, Crowhurst RN et al (2011) The genome of woodland strawberry (Fragaria vesca). Nat Genet 43 (2): 109-116
Prunus persica	v1.0	https://phytozome.jgi.doe.gov/pz/portal.html	International Peach Genome Initiative, Verde I, Abbott AG, Scalabrin S et al (2013) The high-quality draft genome of peach (Prunus persica) identifies unique patterns of genetic diversity, domestication and genome evolution. Nat Genet 45 (5): 487-494
Malus domestica	v1.0	https://phytozome.jgi.doe.gov/pz/portal.html	Velasco R, Zharkikh A, Affourtit J et al (2010) The genome of the domesticated apple (Malus x domestica borkh.). Nat Genet 42 (10): 833-839	http://www.ncbi.nlm.nih.gov/bioproject/PRJNA191060	RNA-seq	SRR768132	SRR768135	SRR767660	SRR768137	SRR768133	RNAseq to improve genome structural annotation of Malus x domestica. Submitted by INRA
Mimulus guttatus	v2.0	https://phytozome.jgi.doe.gov/pz/portal.html	Hellstena U, Wrightb KM, Jenkinsa J et al (2013) Fine-scale variation in meiotic recombination in Mimulus inferred from population shotgun sequencing. Proc Natl Acad Sci U S A 110 (48): 19478-19482
Solanum lycopersicum	iTAG2.3	https://phytozome.jgi.doe.gov/pz/portal.html	Tomato Genome Consortium (2012) The tomato genome sequence provides insights into fleshy fruit evolution. Nature 485 (7400): 635-641	http://bar.utoronto.ca/efp_tomato/cgi-bin/efpWeb.cgi	RNA-seq	M82.root	M82.stem	M82.leaf	M82.floral	M82.DevelopingFruit	Koenig D, Jimenez-Gomez JM, Kimura S et al (2013) Comparative transcriptomics reveals patterns of selection in domesticated and wild tomato. Proc Natl Acad Sci U S A 110:E2655-2662
Solanum tuberosum	v3.4	https://phytozome.jgi.doe.gov/pz/portal.html	Potato Genome Sequencing Consortium, Xu X, Pan S, Cheng S et al (2011) Genome sequence and analysis of the tuber crop potato. Nature 475 (7355): 189-195	http://bar.utoronto.ca/efp_potato/cgi-bin/efpWeb.cgi	RNA-seq	BV_N	BV_P_R	BV_L	BV_T	STD_AF	Massa AN, Childs KL, Lin H et al (2011) The transcriptome of the reference potato genome Solanum tuberosum group phureja clone dm1-3 516r44. PLoS ONE 6:e26801
Monocotyledoneae
Zostera marina	v2.2	https://phytozome.jgi.doe.gov/pz/portal.html	Olsen JL., Rouze P, Verhelst B et al (2016) The genome of the seagrass Zostera marina reveals angiosperm adaptation to the sea. Nature 530, 331-335
Spirodela polyrhiza	v2	https://phytozome.jgi.doe.gov/pz/portal.html	Wang W, Haberer G, Gundlach H et al (2014) The Spirodela polyrhiza genome reveals insights into its neotenous reduction fast growth and aquatic lifestyle. Nat Commun 5, 3311
Dendrobium officinale	v2	http://202.203.187.112/herbalplant/	Yan L, Wang X, Liu H et al (2015) The genome of Dendrobium officinale illuminates the biology of the important traditional chinese orchid herb. Molecular Plant 8:922-934
Oryza sativa	v7	https://phytozome.jgi.doe.gov/pz/portal.html	Ouyang S, Zhu W, Hamilton J et al (2007) The TIGR rice genome annotation resource: Improvements and new features. Nucleic Acids Res 35:883-887
Zea mays	AGPv3	https://phytozome.jgi.doe.gov/pz/portal.html	Schnable PS, Ware D, Fulton RS et al (2009) The b73 maize genome: Complexity, diversity, and dynamics. Science 326:1112-1115

## Sheet: SupTable2-sequences
	species	chromosome	gene_start	gene_end	fragment_start	fragment_end	embedded_genes	sequence_similar_to	similarity	name for short (totally 190 sequences)
	P. patens
		Chr02	20407484	20410053	20408032	20408956	Phpat.002G126000	Phpat.024G048400	0.9807
		Chr02	21352222	21353415	21353303	21352377	Phpat.002G134400	Phpat.024G048400	0.9858
		Chr02	21424931	21427330	21426937	21426011	Phpat.002G134600	Phpat.024G048400	0.9858
		Chr02	21832070	21834817	21833985	21833608	Phpat.002G137300
		Chr02	24507741	24510254	24508649	24509621	Phpat.002G147600	Phpat.002G148000	0.9992
		Chr02	24612985	24615603	24614782	24613810	Phpat.002G148000			Phpa148000
		Chr02	24643134	24646716	24643955	24644927	Phpat.002G148100	Phpat.002G148000	0.9992
		Chr02	24696126	24698744	24697923	24696951	Phpat.002G148300	Phpat.002G148000	1
		Chr02			24722073	24722275
		Chr02	24813617	24814900	24814609	24813637	Phpat.002G148500	Phpat.002G148000	1
		Chr03	11945077	11946156	11945305	11945664	Phpat.003G064600
		Chr03	11947566	11948743			Phpat.003G064700
		Chr11	1764432	1765640	1765571	1764585	Phpat.011G012100			Phpa012100
		Chr11			2744335	2744712
		Chr18	3935838	3937031	3936917	3935993	Phpat.018G016900
		Chr19	3508254	3509423	3509393	3508294	Phpat.019G021500	Phpat.019G021700	1
		Chr19	3517860	3520021	3518298	3519397	Phpat.019G021600	Phpat.019G021700	1
		Chr19	3588590	3591229	3590471	3589372	Phpat.019G021700		1	Phpa0211700
		Chr19	3628732	3629901	3629871	3628772	Phpat.019G021800	Phpat.019G021700	1
		Chr19	8938646	8939060	8938977	8938537	Phpat.019G046300
		Chr19	8958033	8959494			Phpat.019G046500
		Chr19	9046846	9048039	9046960	9047821	Phpat.019G047000			Phpa047000
		Chr21	4937310	4938954	4938549	4937595	Phpat.021G025200	Phpat.024G048400	0.995
		Chr21	4949713	4951684	4951322	4950368	Phpat.021G025500	Phpat.024G048400	0.9913
		Chr21	13534807	13536828	13535545	13536500	Phpat.021G072400			Phpa072400
		Chr24	8857654	8859509	8857551	8858499	Phpat.024G048200	Phpat.024G048400	1
		Chr24	8863559	8865200	8863969	8864920	Phpat.024G048400			Phpa048400
		Chr24	12081254	12083913	12083153	12082054	Phpat.024G065200	Phpat.019G021700	0.9944
		Chr24	12101780	12104006	12102110	12103209	Phpat.024G065300	Phpat.019G021700	0.9944
	S. moelledorffii
		scaffold_1	4676577	4677807	4677549	4676589	403771			Semo403771
		scaffold_17	2292949	2293986	2293233	2293187	231846
		scaffold_25			863341	863304
		scaffold_3			2183460	2183423
		scaffold_3			3645125	3645079
		scaffold_33			79057	78047
		scaffold_5			862989	862024
		scaffold_5	3009614	3011373	3010893	3009883	270496			Semo270496
		scaffold_53			465332	465208
		scaffold_68	819992	821245	820721	820620	122361
		scaffold_7	1095770	1097010	1096962	1096829	230794
		scaffold_78			139703	139804
	A. trichopoda
		AmTr_v1.0_scaffold00111	242191	245288	244267	242210	ERN00151			Amtr000151
		AmTr_v1.0_scaffold00102	1094490	1096886	1096886	1094491	ERN00546			Amtr000546
		AmTr_v1.0_scaffold00102	1102629	1113018	1113018	1102630	ERN00547			Amtr000547
		AmTr_v1.0_scaffold00039	739012	743110	743092	739020	ERN15745			Amtr015745
		AmTr_v1.0_scaffold00182	515404	517540	515369	517521	ERN16348			Amtr016348
		AmTr_v1.0_scaffold00066	1091156	1091605	1091083	1091864	ERN20157
	A. coerulea
		scaffold_2	5832356	5833873	5833783	5832520	Aquca_002_00757			Aqco000757
		scaffold_4	3640380	3641986	3640482	3641731	Aquca_004_00221			Aqco000221
		scaffold_5			4771572	4771676
		scaffold_6	5032866	5035294	5033347	5034311	Aquca_006_00182			Aqco000182
		scaffold_13	5295689	5297565	5297099	5296151	Aquca_013_00799			Aqco000799
		scaffold_33			278264	278427
		scaffold_33			279511	279247
		scaffold_33	284199	284459	283771	284456	Aquca_033_00018
		scaffold_34	1636011	1637505	1637374	1636165	Aquca_034_00236			Aqco000236
		scaffold_69	678477	679480	678213	679452	Aquca_069_00031			Aqco000031
		scaffold_115	97199	99343	99248	97511	Aquca_115_00005			Aqco000005
	V. vinifera
		chr3	1006320	1009717	1007095	1007825	chr3.gff3_MRNA_VIT_03s0038g01460			Vivi03s460
		chr5	13597428	13599519	13597504	13599346	chr5.gff3_MRNA_VIT_05s0136g00260			Vivi05s260
		chr10	14216111	14217284	14216112	14217662	chr10.gff3_MRNA_VIT_10s0042g00840	chr10.gff3_MRNA_VIT_10s0042g00930	0.9606
		chr10	14246930	14248625	14246930	14248438	chr10.gff3_MRNA_VIT_10s0042g00870	chr10.gff3_MRNA_VIT_10s0042g00930	0.9801
		chr10	14264601	14265706	14264038	14265582	chr10.gff3_MRNA_VIT_10s0042g00890	chr10.gff3_MRNA_VIT_10s0042g00930	0.9792
		chr10	14284185	14285736	14284235	14285735	chr10.gff3_MRNA_VIT_10s0042g00910	chr10.gff3_MRNA_VIT_10s0042g00930	0.9614
		chr10	14298956	14300552	14298957	14300505	chr10.gff3_MRNA_VIT_10s0042g00920	chr10.gff3_MRNA_VIT_10s0042g00930	0.9917
		chr10	14304786	14306520	14304787	14306331	chr10.gff3_MRNA_VIT_10s0042g00930			Vivi10s930
		chr14	24673459	24675059	24673548	24674828	chr14.gff3_MRNA_VIT_14s0068g00920			Vivi14s920
		chr14	24686995	24688542	24687036	24688356	chr14.gff3_MRNA_VIT_14s0068g00930			Vivi14s930
		chr15	13099190	13100695	13100162	13099211	chr15.gff3_MRNA_VIT_15s0021g02170			Vivi15s170
		chr16	12591947	12592329	12591564	12592903	chr16.gff3_MRNA_VIT_16s0022g01000
		chr16			12597080	12597231
		chr16	12637602	12638601	12636949	12638541	chr16.gff3_MRNA_VIT_16s0022g01020			Vivi16s020
		chr16			12709918	12710058
		chr16			12726773	12727079
		chr16			12763213	12764652
		chr16			12826916	12827465
		chr16	12948452	12949378	12946685	12949391	chr16.gff3_MRNA_VIT_16s0022g01140	chr16.gff3_MRNA_VIT_16s0022g01020	0.9784
		chr16	13046370	13047296	13045686	13047309	chr16.gff3_MRNA_VIT_16s0022g01190	chr16.gff3_MRNA_VIT_16s0022g01020	0.9795
		chr16	16238965	16240683	16239037	16240551	chr16.gff3_MRNA_VIT_16s0100g00750			Vivi16s750
		chr16	16268744	16270610	16252503	16254016	chr16.gff3_MRNA_VIT_16s0100g00770			Vivi16s770
		chr16			16268826	16270339
		chr16	16276570	16278316	16276579	16278092	chr16.gff3_MRNA_VIT_16s0100g00780	chr16.gff3_MRNA_VIT_16s0100g00830	0.9777
		chr16	16286794	16288079	16284997	16290739	chr16.gff3_MRNA_VIT_16s0100g00800	chr16.gff3_MRNA_VIT_16s0100g00920	0.9922
		chr16			16285011	16284844
		chr16	16289329	16290878			chr16.gff3_MRNA_VIT_16s0100g00810	chr16.gff3_MRNA_VIT_16s0100g00940	0.9676
		chr16			16324187	16323799
		chr16	16335657	16337482	16335707	16337220	chr16.gff3_MRNA_VIT_16s0100g00830			Vivi16s830
		chr16	16343076	16344518	16344516	16343217	chr16.gff3_MRNA_VIT_16s0100g00840	chr16.gff3_MRNA_VIT_16s0100g00920	0.9923
		chr16	16346418	16347950	16347949	16346597	chr16.gff3_MRNA_VIT_16s0100g00850	chr16.gff3_MRNA_VIT_16s0100g00940	0.9739
		chr16	16349897	16351446	16351428	16350076	chr16.gff3_MRNA_VIT_16s0100g00860			Vivi16s860
		chr16	16366812	16368417	16368410	16366925	chr16.gff3_MRNA_VIT_16s0100g00880	chr16.gff3_MRNA_VIT_16s0100g00900	0.9859
		chr16	16385884	16397049	16387529	16386030	chr16.gff3_MRNA_VIT_16s0100g00900			Vivi16s900
		chr16	16398234	16399992	16398244	16399757	chr16.gff3_MRNA_VIT_16s0100g00910	chr16.gff3_MRNA_VIT_16s0100g00830	0.995
		chr16	16405075	16406533	16406519	16405220	chr16.gff3_MRNA_VIT_16s0100g00920			Vivi16s920
		chr16	16408318	16409839	16409837	16408488	chr16.gff3_MRNA_VIT_16s0100g00930	chr16.gff3_MRNA_VIT_16s0100g00940	0.9715
		chr16	16411757	16413318	16413317	16411965	chr16.gff3_MRNA_VIT_16s0100g00940
		chr16	16430833	16431392	16431720	16431101	chr16.gff3_MRNA_VIT_16s0100g00950	chr16.gff3_MRNA_VIT_16s0100g00990	0.9911
		chr16	16440652	16441618	16441617	16440531	chr16.gff3_MRNA_VIT_16s0100g00960	chr16.gff3_MRNA_VIT_16s0100g01000	0.987
		chr16	16466739	16468638	16468540	16467028	chr16.gff3_MRNA_VIT_16s0100g00990			Vivi16s990
		chr16	16476944	16478681	16478613	16477116	chr16.gff3_MRNA_VIT_16s0100g01000			Vivi16s000
		chr16	16491413	16493132	16493122	16491610	chr16.gff3_MRNA_VIT_16s0100g01010	chr16.gff3_MRNA_VIT_16s0100g00990	0.9919
		chr16	16503611	16505168	16505168	16503655	chr16.gff3_MRNA_VIT_16s0100g01020	chr16.gff3_MRNA_VIT_16s0100g00900	0.9809
		chr16	16507726	16509479	16509470	16507955	chr16.gff3_MRNA_VIT_16s0100g01030	chr16.gff3_MRNA_VIT_16s0100g00990	0.9642
		chr16	16509480	16512735	16511216	16512584	chr16.gff3_MRNA_VIT_16s0100g01040			Vivi16s040
		chr16	16520942	16521965	16523835	16520387	chr16.gff3_MRNA_VIT_16s0100g01060
		chr16	16526141	16527943	16527853	16526341	chr16.gff3_MRNA_VIT_16s0100g01070			Vivi16s070
		chr16	16555715	16557501	16557426	16555964	chr16.gff3_MRNA_VIT_16s0100g01100			Vivi16s100
		chr16	16587220	16614892	16588975	16587460	chr16.gff3_MRNA_VIT_16s0100g01110
		chr16			16608721	16607192
		chr16	16615515	16617259	16617248	16615715	chr16.gff3_MRNA_VIT_16s0100g01120			Vivi16s120
		chr16	16618991	16624707	16620536	16619006	chr16.gff3_MRNA_VIT_16s0100g01130			Vivi16s130
		chr16			16624615	16623099
		chr16	16627367	16629171	16629082	16627549	chr16.gff3_MRNA_VIT_16s0100g01140	chr16.gff3_MRNA_VIT_16s0100g01070	0.9503
		chr16	16644049	16645804	16645738	16644203	chr16.gff3_MRNA_VIT_16s0100g01150			Vivi16s150
		chr16			16649018	16647488
		chr16	16673901	16675545	16675515	16673999	chr16.gff3_MRNA_VIT_16s0100g01160	chr16.gff3_MRNA_VIT_16s0100g01190	0.9759
		chr16	16682549	16684265	16684255	16682722	chr16.gff3_MRNA_VIT_16s0100g01170	chr16.gff3_MRNA_VIT_16s0100g01070	0.9522
		chr16	16698041	16699922	16699830	16698316	chr16.gff3_MRNA_VIT_16s0100g01190			Vivi16s190
		chr16	16710107	16711898	16711809	16710293	chr16.gff3_MRNA_VIT_16s0100g01200	chr16.gff3_MRNA_VIT_16s0100g01070	0.9895
	C. sinensis
		scaffold00001	719034	720474	720317	719047	orange1.1g016361m			Cisi016361
		scaffold00004			51562	52178
		scaffold00004	774169	776109	775722	774501	orange1.1g016111m			Cisi016111
		scaffold00004	781078	782393	781138	782371	orange1.1g047978m			Cisi047978
		scaffold00017			1055799	1055674
		scaffold00062			195332	194906
		scaffold00089			214073	212921
		scaffold00220	159806	161128	161061	159831	orange1.1g044410m			Cisi044410
		scaffold00288	12763	14032	13983	12782	orange1.1g016081m			Cisi016081
		scaffold00288	105987	107478	107399	106187	orange1.1g016094m			Cisi016094
		scaffold00358	37676	39305	37736	39013	orange1.1g016330m			Cisi016330
		scaffold00450	30342	31639	30650	31630	orange1.1g016569m			Cisi016569
		scaffold00496			70859	71038
		scaffold01214	27660	28916	27691	28900	orange1.1g036844m			Cisi036844
		scaffold03256			1769	1820
	C. clementina
		scaffold_2	11863906	11865549	11863968	11865239	Ciclev10015535m			Cicl015535
		scaffold_3	50307772	50309441	50307887	50309158	Ciclev10020530m			Cicl020530
		scaffold_5			16076892	16078044
		scaffold_5	37161364	37162615	37162619	37161377	Ciclev10003127m			Cicl003127
		scaffold_5	37169957	37171699	37170023	37171256	Ciclev10001405m			Cicl001405
		scaffold_5	37913157	37914626	37914598	37913364	Ciclev10001395m			Cicl001395
		scaffold_5	38205686	38206878	38206907	38205911	Ciclev10001905m			Cicl001905
		scaffold_5	38221253	38223854	38221298	38223640	Ciclev10001413m			Cicl001413
		scaffold_7			707869	707999
		scaffold_7	18672489	18674078	18672572	18673875	Ciclev10025807m			Cicl025807
		scaffold_7	18714158	18715461	18714158	18715443	Ciclev10025804m			Cicl025804
		scaffold_7			18761426	18761477
		scaffold_8	7890299	7892517	7890678	7891658	Ciclev10028633m			Cicl028633
		scaffold_8	10272178	10273455	10272227	10273439	Ciclev10028605m			Cicl028605
		scaffold_8	10357519	10359090	10357568	10358771	Ciclev10028604m			Cicl028604
		scaffold_8	10390482	10391738	10390513	10391722	Ciclev10030398m			Cicl030398
		scaffold_8	10462836	10464196	10462867	10464182	Ciclev10030093m			Cicl030093
		scaffold_9	10246239	10248409	10246239	10248127	Ciclev10005133m			Cicl005133
		scaffold_9			28788939	28789365
	A. thaliana
		Chr1	359117	360518	360147	359188	AT1G02050			Arth102050
		Chr4	14627	16079	14923	15897	AT4G00040			Arth400040
		Chr4	16608313	16609829	16608639	16609699	AT4G34850			Arth434850
		Chr5	4488688	4490264	4488795	4490032	AT5G13930			Arth513930
	B. oleracea
		chr1			2190227	2189077
		chr1	3325492	3326220			Bo1g010030
		chr2			3150329	31520593
		chr2	45854945	45855604	45854998	45855626	Bo2g146220
		chr2	47357698	47358843	47357716	47358765	Bo2g150150			Brol150150
		chr2	47363902	47365170	47363932	47365163	Bo2g150170			Brol150170
		chr2	47365402	47368096	47367785	47368313	Bo2g150180
		chr2			47372502	47372591
		chr3	3212672	3214157	3212705	3214153	Bo3g009440			Brol009440
		chr3	17179475	17180763	17179787	17180763	Bo3g042110			Brol042110
		chr3	20969672	20970202	20970229	20969590	Bo3g052930
		chr3			59218724	59217690
		chr4	50002646	50003970	50003629	50002668	Bo4g187290			Brol187290
		chr5			173536	173663
		chr7	46808375	46809853	46808552	46809828	Bo7g117110			Brol117110
		chr9	824986	826252	825013	826248	Bo9g004350			Brol004350
		chr9	49232010	49233272	49233242	49232014	Bo9g166290			Brol166290
	B. rapa
		chr1	1651763	1653115	1652840	1652176	Bra011566			Brra011566
		chr2	2357734	2359185	2357754	2359178	Bra023441			Brra023441
		chr2	23204660	23205928	23204690	23208420	Bra020688			Brra020688
		chr2	23208350	23208514	23208350	23208514	Bra020687
		chr3	2596137	2597594	2596170	2597590	Bra006224			Brra006224
		chr3	11791128	11792419	11791443	11792239	Bra000559			Brra000559
		chr3	29792247	29793792	29792424	29793767	Bra017681			Brra017681
		chr4	16428705	16432741	16429688	16428727	Bra017147			Brra017147
		chr6	10003148	10005547	10004895	10005474	Bra018109
		chr7	17676715	17678477			Bra003675
		chr8			11437925	11438570
		chr8	11447516	11448855	11448575	11447541	Bra034658			Brra034658
		chr9	695971	697415	695988	697411	Bra036307			Brra036307
		chr9			24792598	24792068
		chr10			3486832	3486959
		chr10	12657235	12655973	12657205	12655979	Bra008792			Brra008792
		Scaffold001020	699	1328	849	1291	Bra041147
	P. trichocarpa
		Chr01	2127169	2128888	2127162	2128876	Potri.001G028600			Potr028600
		Chr01	3907994	3910175	3910051	3908438	Potri.001G051500			Potr051500
		Chr01	3915773	3918380	3918227	3916060	Potri.001G051600			Potr051600
		Chr02	10507134	10508400	10508310	10507146	Potri.002G141400			Potr141400
		Chr03	18507178	18509547	18507298	18509257	Potri.003G176700			Potr176700
		Chr03	18514135	18515880	18514272	18515543	Potri.003G176800			Potr176800
		Chr03	18520744	18522855	18520841	18522513	Potri.003G176900			Potr176900
		Chr03	19834068	19834473	19834272	19834089	Potri.003G195100
		Chr03	19839958	19840223	19840213	19839991	Potri.003G195200
		Chr04	18696917	18698622	18697633	18698600	Potri.004G167300			Potr167300
		Chr05	19044448	19044624	19044466	19044638	Potri.005G175100
		Chr05	19053616	19054629	19053641	19054614	Potri.005G175200			Potr175200
		Chr09	10543998	10545936	10545100	10545914	Potri.009G128800			Potr128800
		Chr12	15331801	15333280	15333265	15331944	Potri.012G138800			Potr138800
		Chr14	4377276	4378530	4378437	4366657	Potri.014G056300			Potr056300
		Chr14	11073137	11075285	11075170	11073559	Potri.014G145100			Potr145100
		Chr15			14812728	14812438
	M. truncatula
		chr1	44127878	44129689	44128165	44129456	Medtr1g098140	Medtr1g097910	0.9906
		chr1	44132269	44133790	44132370	44133661	Medtr1g097910			Metr097910
		chr1	44140688	44142315	44140792	44142083	Medtr1g097935	Medtr1g097910	0.9923
		chr2	24163022	24165750	24165622	24163030	Medtr2g058470			Metr058470
		chr3	37858368	37860174	37863898	37858604	Medtr3g083910			Metr083910
		chr3	37862361	37864013	37862361	37864013	Medtr3g083920			Metr083920
		chr3	39029461	39032598	39029509	39030948	Medtr3g086260			Metr086260
		chr3	40410883	40412710	40412646	40411098	Medtr3g088670			Metr088670
		chr3	40420823	40423155	40423056	40421068	Medtr3g088675			Metr088675
		chr4	28872166	28873445	28873101	28872188	Medtr4g075560			Metr075560
		chr4	30428531	30429812	30428624	30429799	Medtr4g078730			Metr078730
		chr5	1477512	1479029	1477586	1478881	Medtr5g007713			Metr007713
		chr5	1481579	1483333	1481697	1483078	Medtr5g007717			Metr007717
		chr5	1485317	1487552	1485466	1487552	Medtr5g007723			Metr007723
		chr5	1491469	1493177	1491587	1493050	Medtr5g007730			Metr007730
		chr5			1495227	1496976
		chr5	1499142	1500122	1499131	1500122	Medtr5g007740			Metr007740
		chr5	1504237	1506210	1504351	1505857	Medtr5g007760			Metr007760
		chr5	1509044	1509941	1509014	1509984	Medtr5g007770			Metr007770
		chr7	5283754	5285399	5283860	5285190	Medtr7g016700	Medtr7g016720	0.9598	Metr016700
		chr7	5288687	5290376	5290267	5288937	Medtr7g016720			Metr016720
		chr7	5301948	5303502	5302048	5303378	Medtr7g016780	Medtr7g016720	0.9658	Metr016780
		chr7	5309596	5311403	5309685	5311279	Medtr7g016800	Medtr7g016720	0.9709	Metr016800
		chr7	5314377	5316167	5314502	5315993	Medtr7g016820	Medtr7g016720	0.9615	Metr016820
		chr7	32529997	32532176	32532033	32530252	Medtr7g084300			Metr084300
		chr7	46706228	46707139	46707219	46706228	Medtr7g113405			Metr113405
		chr8			35250412	35251694
	G. max
		Chr1	14209441	14211569	14211358	14209599	Glyma.01G073600			Glma073600
		Chr1	27621454	27623628	27623510	27621751	Glyma.01G091400			Glma091400
		Chr1	55659009	55660950	55659097	55660711	Glyma.01G228700			Glma228700
		Chr2	13399252	13401493	13399430	13399620	Glyma.02G130400			Glma130400
		Chr2			13400281	13401266
		Chr5	34683688	34684918	34683707	34692987	Glyma.05G153100
		Chr5	34687008	34693243			Glyma.05G153200			Glma153200
		Chr6	9644660	9650144	9644673	9650149	Glyma.06G118500			Glma118500
		Chr6	9644660	9650144			Glyma.06G118600
		Chr8	8384741	8386542	8384839	8386130	Glyma.08G109200			Glma109200
		Chr8	8387508	8391327	8390099	8388814	Glyma.08G109300	Glyma.08G110900	0.9991
		Chr8	8391363	8394840	8392366	8393645	Glyma.08G109400	Glyma.08G109200	0.9803
		Chr8	8397943	8399751	8398178	8399480	Glyma.08G109500			Glma109500
		Chr8	8475792	8477410	8476031	8477316	Glyma.08G110300	Glyma.08G110900	1
		Chr8	8478833	8480215	8480215	8478830	Glyma.08G110400			Glma110400
		Chr8	8504478	8506020	8505938	8504660	Glyma.08G110500	Glyma.08G109200	0.9974
		Chr8	8513951	8515719	8514017	8515294	Glyma.08G110700	Glyma.08G109200	0.9974
		Chr8	8517798	8519303	8519277	8517992	Glyma.08G110900			Glma110900
		Chr9	8120500	8121567	8121527	8121337	Glyma.09G074900
		Chr9	8145493	8147595	8147496	8145692	Glyma.09G075200			Glma075200
		Chr11	802452	804663	802713	804353	Glyma.11G011500			Glma011500
		Chr11	7456117	7457703	7456711	7457681	Glyma.11G097900			Glma097900
		Chr12	1741555	1743168	1742175	1743146	Glyma.12G023800			Glma023800
		Chr13	10733546	10738790	10733561	10738865	Glyma.13G034300			Glma034300
		Chr19	35466391	35469297	35469163	35466619	Glyma.19G105100			Glma105100
		Chr20	45916157	45919530			Glyma.20G224500
	C. sativus
		Chr1	1183553	1184991	1183921	1184325	Cusa006310			Cusa006310
		Chr3	23215802	23218931	23218812	23216260	Cusa600020			Cusa600020
		Chr4	14490797	14492120	14490920	14492118	Cusa358690			Cusa358690
		Chr6	16951863	16952238	16952045	16952227	Cusa376240
	F. vesca
		LG2	17270120	17271389	17267821	17271369	mrna10966.1-v1.0-hybrid			Frve010966
		LG2	17267797	17269037	17267797	17269037	mrna10965.1-v1.0-hybrid			Frve010965
		LG7	6149732	6151108	6151108	6149754	mrna26825.1-v1.0-hybrid			Frve026825
		LG7	6154395	6155736	6155733	6154401	mrna26826.1-v1.0-hybrid			Frve026826
		LG7	11351422	11352892	11352810	11351424	mrna04837.1-v1.0-hybrid			Frve004837
		unanchored	7534017	7535423	7534578	7535401	mrna07378.1-v1.0-hybrid			Frve007378
	P. persica
		scaffold_1	312780	314924	314824	313032	ppa006888m			Prpe006888
		scaffold_1	320088	321562	321483	320105	ppa006899m			Prpe006889
		scaffold_2	15149209	15150642	15149309	15150726	ppa019432m			Prpe006890
		scaffold_4	18805678	18807971	18806962	18807940	ppa006930m			Prpe006891
		scaffold_4			18995911	18982850
		scaffold_4	19087686	19089387	19097432	19087693	ppa025745m			Prpe006891
		scaffold_4	19096007	19097706			ppa021597m
		scaffold_6			7864423	7864527
		scaffold_8	16122456	16123970	16122533	16123948	ppa006852m			Prpe006891
		scaffold_82	96	1288	1288	5	ppa023080m
		scaffold_82	9032	10576	10576	9335	ppa008402m			Prpe006891
	M. domestica
		MDC001054.620	10419	16485	11747	10420	MDP0000267622			Mado267622
		MDC001581.218	1118	2799			MDP0000265279
		MDC003928.273			18226	19515
		MDC004766.506	563	1273	271	1254	MDP0000257119
		MDC004766.533	4406	5962	6745	4423	MDP0000168735
		MDC004766.535	5220	6784			MDP0000432621			Mado432621
		MDC004766.552	11191	11877	11930	11208	MDP0000716308
		MDC007614.438	2691	3827	2730	3803	MDP0000385168
		MDC007614.438			9040	9305
		MDC007825.151	2813	4763	2813	4742	MDP0000137655			Mado137655
		MDC008421.336	321	7971	1819	6	MDP0000280274
		MDC009830.388			2485	3995
		MDC009830.388	12733	14292	12766	14283	MDP0000287919			Mado287919
		MDC009910.228	20530	22216	22171	20367	MDP0000529287
		MDC011072.389	10019	11824	11821	10028	MDP0000575740			Mado575740
		MDC011812.165	2287	4677	2287	4668	MDP0000126567			Mado126567
		MDC011812.165	3985	4278			MDP0000343259
		MDC013271.221	2353	4541	4541	2359	MDP0000686661			Mado686661
		MDC013271.221	2347	2508			MDP0000361563
		MDC013271.221	16039	17384	16042	17370	MDP0000686666			Mado686666
		MDC017443.214			2670	1159
		MDC017443.214	7328	8900	8861	7345	MDP0000302905			Mado302905
		MDC017443.214	13764	15343	13803	15326	MDP0000641583
		MDC017766.81	3876	5414	3915	5397	MDP0000208899			Mado208899
		MDC017766.85	7869	8474	7930	7664	MDP0000573540
		MDC020530.151			14695	15663
	M. guttatus
		scaffold_2	9080974	9081477	9081479	9081032	Migut.B01017			MiguB01017
		scaffold_2	17179865	17181727	17181580	17180079	Migut.B01561			MiguB01561
		scaffold_3			12619938	12619861
		scaffold_7	4163728	4165830	4164017	4165519	Migut.G00627			MiguG00627
		scaffold_7	4176715	4178346	4176779	4178008	Migut.G00628			MiguG00628
		scaffold_7	4214624	4215988	4214653	4215982	Migut.G00629			MiguG00629
		scaffold_7	4224519	4225115	4224340	4225108	Migut.G00630
		scaffold_8	2913510	2914213	2913505	2913952	Migut.H00487			MiguH00487
		scaffold_14	9291669	9293311	9292801	9291834	Migut.N01286			MiguN01286
	S. lycopersicum
		SL2.40ch00			12866375	12866503
		SL2.40ch01	76030339	76031941	76031702	76030443	Solyc01g090600			Soly090600
		SL2.40ch01	89223425	89225729	89224153	89225504	Solyc01g111070			Soly111070
		SL2.40ch05	62446317	62449836	62448739	62449725	Solyc05g053170			Soly053170
		SL2.40ch05	62779402	62781543	62779512	62780948	Solyc05g053550			Soly053550
		SL2.40ch06	26052388	26052870	26052739	26052390	Solyc06g043120
		SL2.40ch06	26062527	26063039	26063025	26062632	Solyc06g043130
		SL2.40ch09	66123066	66125217	66123173	66125782	Solyc09g091510			Soly091510
		SL2.40ch12	64084430	64086291	64084993	64085986	Solyc12g098090			Soly098090
	S. tuberosum
		chr01	75957965	75959284	75959188	75957965	PGSC0003DMT400095725			Sotu095725
		chr01	93203464	93205286	93204209	93205264	PGSC0003DMT400004133			Sotu004133
		chr05	57642102	57645293	57642144	57645291	PGSC0003DMT400069814			Sotu069814
		chr05	58148499	58150268	58148628	58150104	PGSC0003DMT400049165			Sotu049165
		chr08			36060675	36060785
		chr09	50007072	50009155	50007194	50008988	PGSC0003DMT400076178			Sotu076178
		chr09	50011634	50014143	50011643	50014168	PGSC0003DMT400076179			Sotu076179
		chr12	65369040	65370060	65368571	65369965	PGSC0003DMT400022261
		chr12	65373835	65375026	65373641	65375025	PGSC0003DMT400022255			Sotu022255
		chr12	65378794	65380350	65378812	65380350	PGSC0003DMT400022258			Sotu022258
		chr12	65391070	65393662	65391212	65393519	PGSC0003DMT400022254			Sotu022254
		chr12	65567110	65569634	65569499	65567240	PGSC0003DMT400043447			Sotu043447
		chr12	65574667	65575905			PGSC0003DMT400043446
		chr12	65587166	65589086	65587932	65588924	PGSC0003DMT400043464			Sotu043464
	Monocots
	Z. marina
		scaffold_11	260389	261850	261785	260639	Zosma11g00330.1			Zoma11g330
		scaffold_113	175395	176669	175422	176658	Zosma113g00090.1			Zoma113090
		scaffold_113	168133	169561	169542	168268	Zosma113g00070.1			Zoma113070
		scaffold_132	337328	338215	337224	338193	Zosma132g00440.1			Zoma132440
		scaffold_14	104000	105261	104022	105249	Zosma14g00280.1			Zoma14g280
		scaffold_240	232866	234293	233409	234270	Zosma240g00250.1			Zoma240250
		scaffold_263	25341	27690	27625	26480	Zosma263g00020.1			Zoma263020
		scaffold_3	546247	546705	546872	546423	Zosma3g00960.1
		scaffold_3	546814	547174	547152	546983	Zosma3g00970.1
		scaffold_44	74345	75885	75841	74474	Zosma44g00150.1			Zoma44g150
		scaffold_52	198099	199828	199482	198229	Zosma52g00210.1			Zoma52g210
		scaffold_59	310681	312045	310773	311924	Zosma59g00330.1			Zoma59g330
		scaffold_59	307270	308688	308600	307449	Zosma59g00320.1			Zoma59g320
		scaffold_678	24052	24258	24345	24069	Zosma678g00020.1
		scaffold_678	24887	25192	25139	24890	Zosma678g00030.1
		scaffold_678	14632	14838	15030	14649	Zosma678g00010.1
	S. polyrhiza
		pseudo1	3979045	3980394	3979587	3980273	Spipo1G0062300			Sppo062300
		pseudo4	5606590	5607874	5607859	5606601	Spipo4G0065100			Sppo065100
		pseudo16	1237672	1238927	1238179	1238800	Spipo16G0013800			Sppo013800
	D. officinale
		scaffold3309	85993	87273	86003	87270	Dendrobium_GLEAN_10080376			Deof080376
		scaffold10498	6045	6758	6076	6726	Dendrobium_GLEAN_10031366
		scaffold11557	27313	28326	28014	27334	Dendrobium_GLEAN_10028290
		scaffold12018	238	10408	5185	6451	Dendrobium_GLEAN_10026586
		scaffold12018			158	872
		scaffold13006			832	658
		scaffold1387			36467	36242
		scaffold1387			31032	31254
		scaffold13926	21742	22653	22733	21742	Dendrobium_GLEAN_10021253			Deof021253
		scaffold13926	23203	24746	24738	24564	Dendrobium_GLEAN_10021254
		scaffold14799	18840	23360	20107	18834	Dendrobium_GLEAN_10019430			Deof019430
		scaffold1580	26340	29665	29664	26344	Dendrobium_GLEAN_10103920			Deof103920
		scaffold18234	1692	10031	10078	9823	Dendrobium_GLEAN_10014110
		scaffold4315	8943	10215	9937	8941	Dendrobium_GLEAN_10069911			Deof069911
		scaffold512	15178	16437	15169	16439	Dendrobium_GLEAN_10125954			Deof125954
		scaffold512	20096	21360	20087	21362	Dendrobium_GLEAN_10125955			Deof125955
	O. sativa
		Chr1	23688289	23692031	23689207	23688309	LOC_Os01g41834.1			Orsa041834
		Chr10	3696797	3698774	3696851	3698599	LOC_Os10g07040.1
		Chr10	4226902	4229142	4226956	4228971	LOC_Os10g07616.1
		Chr10	4680918	4682894	4680966	4682297	LOC_Os10g08620.1
		Chr10	4700276	4701808	4700324	4701211	LOC_Os10g08670.1
		Chr10	4709135	4713981	4709183	4709317	LOC_Os10g08680.1
		Chr10	4725371	4726288			LOC_Os10g08710.1
		Chr10	5334799	5336232	5338972	5334964	LOC_Os10g09860.1
		Chr10	18316325	18318781	18317422	18318374	LOC_Os10g34360.1			Orsa034360
		Chr10	19809157	19809585	19809498	19809342	LOC_Os10g36972.1
		Chr11			2375857	2375918
		Chr11	19207697	19208437			LOC_Os11g32540.1
		Chr11	19211242	19211842	19211834	19208103	LOC_Os11g32550.1
		Chr11	19226735	19228499	19228406	19227527	LOC_Os11g32580.1			Orsa032580
		Chr11	19236424	19238358	19236445	19237882	LOC_Os11g32610.1			Orsa032610
		Chr11	19243252	19244840	19244756	19243280	LOC_Os11g32620.1			Orsa032620
		Chr11	19277557	19281016	19280832	19277990	LOC_Os11g32650.1			Orsa032650
		Chr11	21102794	21104586	21103560	21103923	LOC_Os11g35930.1			Orsa035930
		Chr12	3864182	3864607	3864436	3864255	LOC_Os12g07690.1
		Chr4	258818	263006	259943	259132	LOC_Os04g01354.1			Orsa001354
		Chr4	13689982	13691362	13690893	13690442	LOC_Os04g23940.1
		Chr5	6975843	6978049	6977995	6976410	LOC_Os05g12180.1
		Chr5	6982114	6983529	6983475	6982681	LOC_Os05g12190.1
		Chr5	6991336	6993702	6993607	6992032	LOC_Os05g12210.1
		Chr5	7004068	7005454	7005400	7004635	LOC_Os05g12240.1
		Chr5	24382439	24382876	24382448	24382750	LOC_Os05g41645.1
		Chr7	6294613	6296305	6296290	6294631	LOC_Os07g11440.1			Orsa011440
		Chr7	10018726	10020736	10018873	10020005	LOC_Os07g17010.1			Orsa017010
		Chr7	12884544	12886091	12885504	12885381	LOC_Os07g22850.1
		Chr7	18852472	18856432	18856378	18852883	LOC_Os07g31750.1
		Chr7	18873790	18875926	18875698	18874544	LOC_Os07g31770.1			Orsa031770
		Chr7	20420138	20421516	20421455	20420165	LOC_Os07g34140.1			Orsa034140
		Chr7	20455512	20456848	20456799	20455969	LOC_Os07g34190.1			Orsa034190
	Z. mays
		1	229958908	229962459	229961582	229960974	GRMZM2G380650_T02			Zema380650
		2	231910708	231911261	231910495	231911277	GRMZM5G862605_T01
		2	231907846	231911227	231907929	231908076	AC148152.3_FGT006
		2	224558005	224561990	224561715	224558372	GRMZM2G151227_T01			Zema151227
		2	224558359	224561844	224558005	224561990	GRMZM5G818346_T01
		2	224461089	224462517	224462386	224461582	GRMZM2G027130_T01
		3	47075947	47079282	47079213	47076058	AC191551.3_FGT003			Zema191551
		3	47075969	47077279			GRMZM2G334954_T01
		3	46579712	46580232			GRMZM2G432053_T01
		3	46573878	46575942	46580158	46574091	GRMZM2G131529_T01			Zema131529
		3	46573926	46574956			GRMZM2G432090_T01
		3	46455418	46459264	46455492	46459153	GRMZM2G435393_T01			Zema435393
		3	46458170	46459242			GRMZM5G815206_T01
		4	200493968	200497487	200496673	200492310	GRMZM2G114471_T01
		4	192838961	192840700	192839226	192840344	GRMZM2G009348_T01			Zema009348
		4	192822848	192824296	192823412	192840342	GRMZM2G009510_T01
		4	192758391	192761788	192758640	192761332	GRMZM2G422750_T02
		4	48266621	48267141	48267067	48266921	GRMZM2G103734_T01
		5	136454233	136457851	136454335	136457051	GRMZM2G346095_T01			Zema346095
		5	26991391	26995013	26992160	26992774	GRMZM2G477683_T01			Zema477683
		7	150838797	150840847	150840670	150839802	GRMZM2G175812_T01			Zema175812

## Sheet: SupTable3-PAML
	One-ratio and two-ratio models
	clade/branch	model	np	lnL	compare	2|ΔlnL|	Significant	ω	ω (background)	ω (foreground)
	all	Null (one-ratio)	385	-79575.1				0.07946	-	-
	A		386	-79569.4	2,0 vs 0,0	11.4796	yes		0.07948	inf.
	a1		386	-79573.9	2,0 vs 0,0	2.39615	no		0.07964	0.04508
	a2		386	-79575.1	2,0 vs 0,0	0.016504	no		0.07947	0.06217
	a3		386	-79567.5	2,0 vs 0,0	15.2145	yes		0.07994	0.01937
	a3'		386	-79574	2,0 vs 0,0	2.24194	no		0.07924	0.13616
	a4		386	-79574.9	2,0 vs 0,0	0.431528	no		0.07952	0.0354
	a5		386	-79574	2,0 vs 0,0	2.33423	no		0.07964	0.04512
	a6		386	-79573.4	2,0 vs 0,0	3.48044	no		0.07961	0.02289
	a6'		386	-79567.6	2,0 vs 0,0	15.0297	yes		0.07922	inf.
	B		386	-79571.6	2,0 vs 0,0	6.99874	yes		0.07959	0.00637
	b1		386	-79575.1	2,0 vs 0,0	0.077532	no		0.07944	0.09929
	b2		386	-79574.9	2,0 vs 0,0	0.515714	no		0.07941	0.15488
	Branch-sites models
	clade/branch	model	np	lnL	2|ΔlnL|	Significant	Class 0	Class 1	Class 2a	Class 2b
	A	Null 1 (M1a)	386	-79337.4		-	p = 0.97669 ω = 0.07779	p = 0.023331 ω = 1	-	-
		Null 2 (neutral)	387	-79327.4	20.051	yes (vs Null 1)	p = 0.72299 ωbackground = 0.07765 ωforeground = 0.07765	p = 0.01725 ωbackground = 1 ωforeground = 1	p = 0.25371 ωbackground = 0.07765 ωforeground = 1	p = 0.00605 ωbackground = 1 ωforeground = 1
		Positive Selection	388	-79321.4	11.8757	yes (vs Null 2)	p = 0.81752 ωbackground = 0.07773 ωforeground = 0.07773	p = 0.01951 ωbackground = 1 ωforeground = 1	p = 0.15917 ωbackground = 0.07773 ωforeground = inf.	p = 0.00380 ωbackground = 1 ωforeground = inf.
	a6'	Null 1 (M1a)	386	-79337.4			p = 0.97669 ω = 0.07779	p = 0.02331 ω = 1	-	-
		Null 2 (neutral)	387	-79327.2	20.3869	yes (vs Null 1)	p = 0.73913 ωbackground = 0.07753 ωforeground = 0.07753	p = 0.01764 ωbackground = 1 ωforeground = 1	p = 0.23757 ωbackground = 0.07753 ωforeground = 1	p = 0.00567 ωbackground = 1 ωforeground = 1
		Positive Selection	388	-79316.6	21.214	yes (vs Null 2)	p = 0.91173 ωbackground = 0.07753 ωforeground = 0.07753	p = 0.02176 ωbackground = 1 ωforeground = 1	p = 0.06496 ωbackground = 0.07753 ωforeground = inf.	p = 0.00155 ωbackground = 1 ωforeground = inf.

## Sheet: SupTable4-express
	species	stable ID	name for short	root	stem	leaf	flower	fruit	LOG2-root	LOG2-stem	LOG2-leaf	LOG2-flower	LOG2-fruit	STD-root	STD-stem	STD-leaf	STD-flower	STD-fruit
	Physcomitrella patens	Phpat.011G012100.1	Phpa012100											na	na	na	na	na
		Phpat.019G021700.1	Phpa021700											na	na	na	na	na
		Phpat.019G047000.1	Phpa047000											na	na	na	na	na
		Phpat.024G048400.1	Phpa048400											na	na	na	na	na
		Phpat.021G072400.1	Phpa072400											na	na	na	na	na
		Phpat.002G148000.1	Phpa148000											na	na	na	na	na
	Selaginella moelledorffii	270496	Semo270496											na	na	na	na	na
		403771	Semo403771											na	na	na	na	na
	Amborella trichopoda	ERN00151	Amtr000151											na	na	na	na	na
		ERN00546	Amtr000546											na	na	na	na	na
		ERN00547	Amtr000547											na	na	na	na	na
		ERN15745	Amtr015745											na	na	na	na	na
		ERN16348	Amtr016348											na	na	na	na	na
	Aquilegia coerulea	Aquca_115_00005.1	Aqco000005											na	na	na	na	na
		Aquca_069_00031.1	Aqco000031											na	na	na	na	na
		Aquca_006_00182.1	Aqco000182											na	na	na	na	na
		Aquca_004_00221.1	Aqco000221											na	na	na	na	na
		Aquca_034_00236.1	Aqco000236											na	na	na	na	na
		Aquca_002_00757.1	Aqco000757											na	na	na	na	na
		Aquca_013_00799.1	Aqco000799											na	na	na	na	na
	Vitis vinifera	VIT_03s0038g01460	Vivi03s460	4.88	3.71	5.17	517.96	5.99	2.55582	2.23573	2.62527	9.01948	2.80529	0.156428	0.121611	0.163982	0.859495	0.183564
		VIT_05s0136g00260	Vivi05s260	307.62	533.99	587.55	1046.24	1269.53	8.26969	9.06337	9.20102	10.0324	10.3112	0.777938	0.864269	0.879242	0.96967	1
		VIT_10s0042g00930	Vivi10s930	249.34	168.12	242.76	47.12	35.23	7.96775	7.4019	7.92932	5.58856	5.17911	0.745095	0.683548	0.740916	0.486307	0.44177
		VIT_14s0068g00920	Vivi14s920	281.46	663.08	1058.58	961.62	664.33	8.1419	9.37521	10.0493	9.91082	9.37793	0.764039	0.898189	0.971508	0.956448	0.898484
		VIT_14s0068g00930	Vivi14s930	254.49	703.92	1171.5	1124.27	326.5	7.99712	9.46132	10.1954	10.1361	8.35535	0.748291	0.907555	0.9874	0.980948	0.787256
		VIT_15s0021g02170	Vivi15s170	2.25	2.02	2.49	596.52	2.6	1.70044	1.59455	1.80323	9.22284	1.848	0.0633865	0.0518684	0.0745669	0.881615	0.0794366
		VIT_16s0100g01000	Vivi16s000	184.14	18.73	44.57	4.45	9.87	7.53247	4.30232	5.51001	2.44626	3.44228	0.69775	0.346399	0.477762	0.144511	0.25285
		VIT_16s0022g01020	Vivi16s020	6.06	2.21	16.14	348.34	40.6	2.81967	1.68257	4.0993	8.44849	5.37851	0.185127	0.0614431	0.324315	0.797387	0.463459
		VIT_16s0100g01040	Vivi16s040	155.46	56.81	31.22	12.73	32.51	7.28965	5.85325	5.00988	3.77926	5.06652	0.671338	0.515097	0.423362	0.289504	0.429523
		VIT_16s0100g01070	Vivi16s070	945.38	112.94	42.95	14.6	53.67	9.88628	6.83213	5.45779	3.96347	5.77268	0.953778	0.621572	0.472082	0.309542	0.506333
		VIT_16s0100g01100	Vivi16s100	895.08	62.76	17.48	11.08	26.51	9.80748	5.99458	4.20789	3.59455	4.78188	0.945208	0.53047	0.336128	0.269413	0.398562
		VIT_16s0100g01120	Vivi16s120	586.76	111.7	72.8	30.47	75.7	9.19908	6.81634	6.20555	4.97591	6.26115	0.879031	0.619855	0.553417	0.419666	0.559466
		VIT_16s0100g01130	Vivi16s130	7.75	6.65	3.44	6.09	3.41	3.12928	2.93546	2.15056	2.82579	2.14078	0.218805	0.197722	0.112347	0.185793	0.111283
		VIT_16s0100g01150	Vivi16s150	35.3	9.65	4.43	2.1	6.01	5.1819	3.41278	2.44095	1.63227	2.80941	0.442073	0.249642	0.143934	0.0559713	0.184012
		VIT_16s0100g01190	Vivi16s190	77.01	2.22	1.38	1.35	1.84	6.28559	1.68706	1.25096	1.23266	1.50589	0.562123	0.0619312	0.0144957	0.0125051	0.0422249
		VIT_16s0100g00750	Vivi16s750	434.95	61.7	20.48	13.44	31.41	8.76802	5.97039	4.42492	3.852	5.01837	0.832143	0.527839	0.359735	0.297416	0.424285
		VIT_16s0100g00770	Vivi16s770	101.93	2.1	1.56	1.62	2.64	6.68552	1.63227	1.35614	1.38957	1.86394	0.605625	0.0559713	0.0259366	0.0295721	0.0811706
		VIT_16s0100g00830	Vivi16s830	730.75	29.68	60.22	12.11	66.29	9.51521	4.93923	5.93593	3.7126	6.07232	0.913416	0.415677	0.52409	0.282253	0.538926
		VIT_16s0100g00860	Vivi16s860	357.28	125.03	143.4	58.53	40.82	8.48494	6.97762	7.17393	5.89554	5.38612	0.801352	0.637398	0.65875	0.519698	0.464286
		VIT_16s0100g00900	Vivi16s900	1.44	1.37	1.32	1.17	1.81	1.28688	1.24489	1.21412	1.1177	1.49057	0.0184028	0.013835	0.0104889	0	0.0405585
		VIT_16s0100g00920	Vivi16s920	522.65	131.94	165.17	32.51	40.93	9.03246	7.05463	7.37652	5.06652	5.38991	0.860907	0.645774	0.680786	0.429523	0.464699
		VIT_16s0100g00990	Vivi16s990	256.88	24.11	23.08	8.62	31.71	8.01056	4.65019	4.58976	3.26604	5.03166	0.749752	0.384238	0.377665	0.23368	0.425731
	Populus trichocarpa	Potri.001G028600.1	Potr028600	17.43	14.03	93.53	62.93		4.20398	3.90977	6.5627	5.99842		0.205055	0.181043	0.397563	0.351509	na
		Potri.001G051500.1	Potr051500	9019.7	114	6129.36	1664.83		13.139	6.84549	12.5818	10.702		0.934292	0.420643	0.888811	0.735395	na
		Potri.001G051600.1	Potr051600	9019.7	114	6129.36	1664.83		13.139	6.84549	12.5818	10.702		0.934292	0.420643	0.888811	0.735395	na
		Potri.014G056300.1	Potr056300	2.23	18.06	90.73	103.13		1.69153	4.25248	6.51932	6.70224		0	0.209012	0.394022	0.408951	na
		Potri.009G128800.1	Potr128800	20.76	34.73	27.83	128.76		4.44361	5.15906	4.8495	7.0197		0.224612	0.283004	0.257739	0.434861	na
		Potri.012G138800.1	Potr138800	57.5	20.63	994.66	58.13		5.87036	4.43496	9.95951	5.88582		0.341057	0.223906	0.674795	0.342318	na
		Potri.002G141400.1	Potr141400	48.53	75.39	41.53	73.66		5.63023	6.25531	5.41041	6.22226		0.321459	0.372475	0.303518	0.369778	na
		Potri.014G145100.1	Potr145100	4512.66	21.3	7360.16	125.2		12.1401	4.47897	12.8457	6.97957		0.852763	0.227498	0.910354	0.431585	na
		Potri.004G167300.1	Potr167300	29.23	40.06	29.26	79.56		4.91791	5.35966	4.91934	6.33199		0.263322	0.299376	0.263439	0.378733	na
		Potri.005G175200.1	Potr175200	28.39	38.23	28.23	65.76		4.87725	5.29389	4.86938	6.06091		0.260004	0.294008	0.259361	0.356609	na
		Potri.003G176700.1	Potr176700	16.2	111.5	890.66	72.16		4.10434	6.81378	9.80035	6.19298		0.196922	0.418055	0.661805	0.367388	na
		Potri.003G176800.1	Potr176800	16.2	111.5	890.66	72.16		4.10434	6.81378	9.80035	6.19298		0.196922	0.418055	0.661805	0.367388	na
		Potri.003G176900.1	Potr176900	3019.83	103.63	15760.5	720.66		11.5607	6.70915	13.9441	9.49518		0.805479	0.409515	1	0.636898	na
	Arabidopsis thaliana	AT1G02050.1	Arth102050	12.61	12.38	17.51	316.05	13.23	3.7666	3.74201	4.21023	8.30857	3.83086	0.150154	0.147397	0.199904	0.659492	0.157362
		AT4G00040.1	Arth400040	75.61	175.23	64.05	471.68	63.78	6.25946	7.46132	6.02348	8.88472	6.01748	0.429705	0.564481	0.403242	0.724102	0.402569
		AT4G34850.1	Arth434850	6.05	4.51	8.06	237.31	12.4	2.81762	2.46205	3.17951	7.8967	3.74416	0.0437366	0.0038628	0.0843187	0.613305	0.147639
		AT5G13930.1	Arth513930	4.38	5.63	1714.58	2600.3	1913.85	2.42761	2.72901	10.7445	11.345	10.903	0	0.0337994	0.932656	1	0.950434
	Brassica oleracea	Bo9g004350.1	Brol004350	0	1.03834	7.61831	1.27607	2.54412	0	1.02739	3.1074	1.18654	1.82543	0	0.14602	0.441646	0.16864	0.259442
		Bo3g009440.1	Brol009440	0	37.0376	9.32456	130.231	14.0444	0	5.24935	3.36801	7.03596	3.91115	0	0.746075	0.478685	1	0.55588
		Bo3g042110.1	Brol042110	0	0.520778	0	0	0	0	0.60481	0	0	0	0	0.0859597	0	0	0
		Bo7g117110.1	Brol117110	0	0	0	0	0	0	0	0	0	0	0	0	0	0	0
		Bo2g150150.1	Brol150150	0	0	0	0	0	0	0	0	0	0	0	0	0	0	0
		Bo2g150170.1	Brol150170	0	13.9745	10.7222	20.9905	11.2322	0	3.90444	3.55117	4.45881	3.61261	0	0.554925	0.504717	0.633717	0.513449
		Bo9g166290.1	Brol166290	14.408	5.67588	4.00849	31.7063	13.0038	3.94561	2.73896	2.32438	5.0315	3.80775	0.560777	0.38928	0.330356	0.715111	0.541183
		Bo4g187290.1	Brol187290	0.724846	0	0	0.638037	0	0.786468	0	0	0.711968	0	0.111778	0	0	0.10119	0
	Brassica rapa	Bra000559	Brra000559	0	0	0	0	0	0	0	0	0	0	0	0	0	0	0
		Bra006224	Brra006224	0	5.4789	167.782	9.60549	43.0991	0	2.69575	7.39902	3.40674	5.46268	0	0.283499	0.77812	0.358271	0.574484
		Bra008792	Brra008792	25.3182	20.6897	681.727	38.5397	52.4951	4.71799	4.43894	9.41516	5.30523	5.74133	0.496169	0.466823	0.990149	0.557926	0.60379
		Bra011566	Brra011566	0.638829	0.326276	0	0	0	0.712665	0.407381	0	0	0	0.0749477	0.0428424	0	0	0
		Bra017147	Brra017147	0.750716	1.66149	0.168873	0.952292	1.22082	0.807945	1.41223	0.225118	0.965169	1.15109	0.0849678	0.148518	0.0236746	0.101502	0.121055
		Bra017681	Brra017681	0	0	0	0	0	0	0	0	0	0	0	0	0	0	0
		Bra020688	Brra020688	0	0	0	0	131.641	0	0	0	0	7.05138	0	0	0	0	0.741561
		Bra023441	Brra023441	0	20.1047	727.525	36.2421	63.4975	0	4.39949	9.50883	5.21886	6.01117	0	0.462674	1	0.548844	0.632167
		Bra034658	Brra034658	0	0	0	0	0	0	0	0	0	0	0	0	0	0	0
		Bra036307	Brra036307	0	0	0.859563	0	0	0	0	0.894964	0	0	0	0	0.0941192	0	0
	Glycine max	Glyma.11G011500.1	Glma011500	599.391	12.0904	114.908	31.692	10.6416	9.22976	3.71044	6.85684	5.03087	3.54122	1	0.402008	0.742905	0.54507	0.383674
		Glyma.12G023800.1	Glma023800	0	0.0167694	0.0173352	0	0	0	0.0239925	0.0247951	0	0	0	0.00259947	0.00268643	0	0
		Glyma.13G034300.1	Glma034300	0	0	0	0	0	0	0	0	0	0	0	0	0	0	0
		Glyma.01G073600.1	Glma073600	0.0246755	0.0515677	0	0.881679	0.0215883	0.0351671	0.0725417	0	0.912021	0.0308139	0.00381019	0.00785955	0	0.098813	0.00333854
		Glyma.09G075200.1	Glma075200	5.76314	0.0166194	7.82401	0.471107	0.489656	2.75769	0.0237797	3.14143	0.556902	0.574979	0.298783	0.00257641	0.340359	0.0603377	0.0622962
		Glyma.01G091400.1	Glma091400	21.6692	0.078391	10.8642	0.68598	0.103871	4.50266	0.10888	3.56854	0.753587	0.142572	0.487842	0.0117967	0.386634	0.0816476	0.0154469
		Glyma.11G097900.1	Glma097900	0	0.015872	0	0.020097	0	0	0.0227186	0	0.0287063	0	0	0.00246145	0	0.00311019	0
		Glyma.19G105100.1	Glma105100	6.90516	13.091	44.2558	381.224	33.8236	2.98279	3.8167	5.50003	8.57827	5.12199	0.323171	0.413521	0.595902	0.929415	0.554943
		Glyma.08G109200.1	Glma109200	6.4583	0.0651954	23.4454	0.807702	0.158685	2.89885	0.0911181	4.61149	0.854157	0.212488	0.314076	0.00987221	0.499633	0.0925438	0.0230221
		Glyma.08G109500.1	Glma109500	6.64446	0.289833	33.9739	0.913835	0.522632	2.93441	0.367184	5.12821	0.936466	0.606567	0.31793	0.0397827	0.555617	0.101462	0.0657187
		Glyma.08G110400.1	Glma110400	2.57745	0.0579529	12.3795	0.647097	0.137993	1.83893	0.0812754	3.74195	0.719926	0.186492	0.199239	0.0088058	0.405423	0.0780005	0.0202055
		Glyma.08G110900.1	Glma110900	7.37264	0.494775	20.9662	1.01908	0.554634	3.06568	0.579928	4.45721	1.0137	0.636575	0.332152	0.0628324	0.482918	0.109829	0.0689698
		Glyma.06G118500.1	Glma118500	12.402	29.237	60.5318	10.5109	17.8065	3.74438	4.91824	5.94326	3.52493	4.23316	0.405685	0.532868	0.643924	0.381909	0.458642
		Glyma.02G130400.1	Glma130400	8.66317	1.43987	9.17007	0.357868	0.176932	3.2725	1.2868	3.34626	0.441343	0.235031	0.354559	0.139419	0.362551	0.0478174	0.0254645
		Glyma.05G153200.1	Glma153200	6.70712	1.83406	30.2897	3.20864	1.15724	2.94619	1.50287	4.96762	2.07335	1.10919	0.319206	0.162829	0.538217	0.224638	0.120175
		Glyma.01G228700.1	Glma228700	447.296	25.7637	377.833	37.5588	24.2169	8.80831	4.74221	8.56542	5.26899	4.65632	0.954338	0.513795	0.928022	0.57087	0.50449
	Medicago truncatula	Medtr5g007713.1	Metr007713											na	na	na	na	na
		Medtr5g007717.1	Metr007717											na	na	na	na	na
		Medtr5g007723.1	Metr007723											na	na	na	na	na
		Medtr5g007730.1	Metr007730						11.42	6.83	9.1	12.21	4.07	0.825853	0.413824	0.617594	0.896768	0.166068
		Medtr5g007740.1	Metr007740						2.22	2.22	2.22	5.04	2.22	0	0	0	0.253142	0
		Medtr5g007760.1	Metr007760						2.95	2.22	2.26	2.22	2.22	0.0655296	0	0.00359066	0	0
		Medtr5g007770.1	Metr007770						2.7	2.23	2.37	2.25	2.23	0.043088	0.000897666	0.013465	0.002693	0.000897666
		Medtr7g016700.1	Metr016700						9.97	2.29	2.31	2.33	2.27	0.695691	0.00628366	0.00807899	0.00987433	0.00448833
		Medtr7g016720.1	Metr016720						10.28	2.72	2.54	3.24	2.93	0.723519	0.0448833	0.0287253	0.0915619	0.0637343
		Medtr7g016780.1	Metr016780						10.3	2.25	2.27	2.51	2.69	0.725314	0.002693	0.00448833	0.0260323	0.0421903
		Medtr7g016800.1	Metr016800						12.55	4.45	4.01	5	6.95	0.927289	0.20018	0.160682	0.249551	0.424596
		Medtr7g016820.1	Metr016820						12.57	2.92	2.84	4.36	5.05	0.929084	0.0628366	0.0556553	0.192101	0.254039
		Medtr2g058470.1	Metr058470											na	na	na	na	na
		Medtr4g075560.1	Metr075560											na	na	na	na	na
		Medtr4g078730.1	Metr078730						2.27	2.27	2.28	2.39	2.3	0.00448833	0.00448833	0.005386	0.0152603	0.00718133
		Medtr3g083910.1	Metr083910						8.21	7.17	5.01	10.08	9.61	0.537702	0.444345	0.250449	0.705566	0.663375
		Medtr3g083920.1	Metr083920						4.68	2.49	2.86	5.11	4.05	0.220826	0.024237	0.0574506	0.259425	0.164273
		Medtr7g084300.1	Metr084300						7.45	12.69	13.36	13.36	12.47	0.469479	0.939856	1	1	0.920108
		Medtr3g086260.1	Metr086260						4.39	2.29	2.44	2.49	2.55	0.194794	0.00628366	0.0197487	0.024237	0.029623
		Medtr3g088670.1	Metr088670											na	na	na	na	na
		Medtr3g088675.1	Metr088675											na	na	na	na	na
		Medtr1g097910.1	Metr097910											na	na	na	na	na
		Medtr7g113405.1	Metr113405											na	na	na	na	na
	Cucumis sativus	Csa1M006310.1	Cusa006310	7.10556	0	3.65182	2.15416	0	3.01891	0	2.2178	1.65726	0	0.436289	0	0.320512	0.239504	0
		Csa3M600020.1	Cusa600020	0	26.0211	120.056	46.7582	24.1557	0	4.75601	6.91953	5.57768	4.65281	0	0.687332	1	0.806077	0.672417
		Csa4M358690.1	Cusa358690	0	0	0	1.05216	0	0	0	0	1.03714	0	0	0	0	0.149886	0
	Malus domestica	MDP0000126567	Mado126567	473.95	500.796	1062.76	0	0.971643	8.89163	8.97096	10.055	0	0.979398	0.884303	0.892192	1	0	0.0974045
		MDP0000137655	Mado137655	149.189	114.423	148.128	0	30.6243	7.23064	6.85079	7.22041	0	4.98296	0.719112	0.681334	0.718094	0	0.495573
		MDP0000208899	Mado208899	54.519	1.22439	0	0	0	5.79491	1.15341	0	0	0	0.576324	0.114711	0	0	0
		MDP0000267622	Mado267622	6.25478	6.0705	3.60041	6.69492	6.16847	2.85893	2.82181	2.20176	2.94391	2.84167	0.284331	0.280639	0.218973	0.292782	0.282613
		MDP0000287919	Mado287919	137.38	1.60923	0.805705	0	0	7.11249	1.38362	0.852562	0	0	0.707362	0.137606	0.0847902	0	0
		MDP0000302905	Mado302905	32.5275	0.223631	0	0	0	5.06727	0.291169	0	0	0	0.503958	0.0289577	0	0	0
		MDP0000432621	Mado432621	1.06052	0	0	0	0	1.04301	0	0	0	0	0.103731	0	0	0	0
		MDP0000575740	Mado575740	106.279	0	0	0	0	6.74522	0	0	0	0	0.670836	0	0	0	0
		MDP0000686661	Mado686661	149.189	114.423	148.128	0	30.6243	7.23064	6.85079	7.22041	0	4.98296	0.719112	0.681334	0.718094	0	0.495573
		MDP0000686666	Mado686666	124.023	201.725	572.58	0	0.715912	6.96605	7.66338	9.16385	0	0.778976	0.692798	0.762149	0.911376	0	0.0774718
	Prunus persica	ppa006852m	Prpe006852											na	na	na	na	na
		ppa006888m	Prpe006888											na	na	na	na	na
		ppa006899m	Prpe006899											na	na	na	na	na
		ppa006930m	Prpe006930											na	na	na	na	na
		ppa008402m	Prpe008402											na	na	na	na	na
		ppa019432m	Prpe019432											na	na	na	na	na
		ppa025745m	Prpe025745											na	na	na	na	na
	Fragaria vesca	mrna04837.1-v1.0-hybrid	Frve004837											na	na	na	na	na
		mrna07378.1-v1.0-hybrid	Frve007378											na	na	na	na	na
		mrna10965.1-v1.0-hybrid	Frve010965											na	na	na	na	na
		mrna10966.1-v1.0-hybrid	Frve010966											na	na	na	na	na
		mrna26825.1-v1.0-hybrid	Frve026825											na	na	na	na	na
		mrna26826.1-v1.0-hybrid	Frve026826											na	na	na	na	na
	Mimulus guttatus	Migut.B01017.1	MiguB01017											na	na	na	na	na
		Migut.B01561.1	MiguB01561											na	na	na	na	na
		Migut.G00627.1	MiguG00627											na	na	na	na	na
		Migut.G00628.1	MiguG00628											na	na	na	na	na
		Migut.G00629.1	MiguG00629											na	na	na	na	na
		Migut.H00487.1	MiguH00487											na	na	na	na	na
		Migut.N01286.1	MiguN01286											na	na	na	na	na
	Solanum lycopersicum	Solyc05g053170.2.1	Soly053170	1.05	0	0	0	0	1.03562	0	0	0	0	0.126093	0	0	0	0
		Solyc05g053550.2.1	Soly053550	2.82	111.92	28.31	295.77	130.15	1.93357	6.81916	4.87332	8.2132	7.03507	0.235423	0.830268	0.593352	1	0.856557
		Solyc01g090600.2.1	Soly090600	0	0	0	0.83	0	0	0	0	0.871844	0	0	0	0	0.106151	0
		Solyc09g091510.2.1	Soly091510	1.34	58.84	17.5	108.58	291.88	1.22651	5.90304	4.20945	6.77584	8.19417	0.149334	0.718726	0.512523	0.824994	0.997682
		Solyc12g098090.1.1	Soly098090	0	0	0	0	0	0	0	0	0	0	0	0	0	0	0
		Solyc01g111070.2.1	Soly111070	0	0	0.86	1.04	12.93	0	0	0.895303	1.02857	3.80012	0	0	0.109008	0.125234	0.462685
	Solanum tuberosum	PGSC0003DMT400049165	Sotu004133	4.8	1.65	0	0	0	2.53605	1.40599	0	0	0	0.231891	0.128561	0	0	0
		PGSC0003DMT400076178	Sotu022254	2.77	0	0	2.05	4.66	1.91456	0	0	1.60881	2.5008	0.175063	0	0	0.147106	0.228668
		PGSC0003DMT400095725	Sotu022255	2.97	0	0	0	0	1.98914	0	0	0	0	0.181882	0	0	0	0
		PGSC0003DMT400076179	Sotu022258	0	0	0	0	0.71	0	0	0	0	0.773996	0	0	0	0	0.0707725
		PGSC0003DMT400043447	Sotu043447	0	0	1.44	0	1.52	0	0	1.28688	0	1.33342	0	0	0.11767	0	0.121925
		PGSC0003DMT400022254	Sotu043464	0	0	0	1.01	0	0	0	0	1.0072	0	0	0	0	0.0920957	0
		PGSC0003DMT400022258	Sotu049165	18.14	40.11	12.18	1039.41	95.94	4.25852	5.36142	3.72028	10.0229	6.59902	0.389389	0.490236	0.340174	0.916475	0.6034
		PGSC0003DMT400043464	Sotu069814	0	0	0	0	0	0	0	0	0	0	0	0	0	0	0
		PGSC0003DMT400004133	Sotu076178	5.92	7.63	20.34	1958.68	69.78	2.79077	3.10936	4.41549	10.9364	6.14527	0.255182	0.284313	0.403742	1	0.56191
		PGSC0003DMT400022255	Sotu076179	0	0.45	19.56	58.11	2.93	0	0.536053	4.36177	5.88533	1.97453	0	0.0490155	0.39883	0.538141	0.180547
		PGSC0003DMT400069814	Sotu095725	0	0	0	0	0	0	0	0	0	0	0	0	0	0	0
	Citrus sinensis	orange1.1g016330m	Cisi016330											na	na	na	na	na
		orange1.1g016081m	Cisi016081											na	na	na	na	na
		orange1.1g016094m	Cisi016094											na	na	na	na	na
		orange1.1g016111m	Cisi016111											na	na	na	na	na
		orange1.1g016361m	Cisi016361											na	na	na	na	na
		orange1.1g016569m	Cisi016569											na	na	na	na	na
		orange1.1g036844m	Cisi036844											na	na	na	na	na
		orange1.1g044410m	Cisi044410											na	na	na	na	na
		orange1.1g047978m	Cisi047978											na	na	na	na	na
	Citrus clementina	Ciclev10001395m	Cicl001395											na	na	na	na	na
		Ciclev10001405m	Cicl001405											na	na	na	na	na
		Ciclev10001413m	Cicl001413											na	na	na	na	na
		Ciclev10001905m	Cicl001905											na	na	na	na	na
		Ciclev10003127m	Cicl003127											na	na	na	na	na
		Ciclev10005133m	Cicl005133											na	na	na	na	na
		Ciclev10015535m	Cicl015535											na	na	na	na	na
		Ciclev10020530m	Cicl020530											na	na	na	na	na
		Ciclev10025804m	Cicl025804											na	na	na	na	na
		Ciclev10025807m	Cicl025807											na	na	na	na	na
		Ciclev10028604m	Cicl028604											na	na	na	na	na
		Ciclev10028605m	Cicl028605											na	na	na	na	na
		Ciclev10028633m	Cicl028633											na	na	na	na	na
		Ciclev10030093m	Cicl030093											na	na	na	na	na
		Ciclev10030398m	Cicl030398											na	na	na	na	na
